# Supplementary material for: A novel approach for solving CNOPs and its application in identifying sensitive regions of tropical cyclone adaptive observations
Source: Copernicus journal article supplement (doi:10.5194/npg-25-693-2018), 2018-09-13
Supplement: Supplementary file 1 [file npg-25-693-2018-supplement.zip]

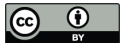

## *Supplement of*

# **A novel approach for solving CNOPs and its application in identifying sensitive regions of tropical cyclone adaptive observations**

**Linlin Zhang et al.**

*Correspondence to:* Shijin Yuan (yuanshijin2003@163.com)

- npg-25-693-2018-supplement-title-page.pdf
- Supplementary Material
  - fitowacpw120
    - \* CNOP.LAST
    - \* p.txt
    - \* p20.txt
  - fitowacpw60
    - \* 0.25cnop
    - \* 0.5cnop
    - \* 0.75cnop
    - \* CNOP.LAST
    - \* cnop
    - \* newener
    - \* p.txt
    - \* p0.5cnop
    - \* p20.txt
  - fitowadj120
    - \* CNOP.LAST
    - \* p.txt
    - \* p20.txt
  - fitowadj60
    - \* 0.25cnop
    - \* 0.5cnop
    - \* 0.75cnop
    - \* CNOP.LAST
    - \* basic

- \* cnop
- \* p.txt
- \* p0.5cnop
- \* p20.txt
- \* weizhi-r.txt
- matmoacpw120
  - \* CNOPLAST
  - \* p.txt
  - \* p20.txt
- matmoacpw60
  - \* 0.25cnop
  - \* 0.5cnop
  - \* 0.75cnop
  - \* CNOPLAST
  - \* cnop
  - \* p.txt
  - \* p0.5cnop
  - \* p20.txt
- matmoadj120
  - \* CNOPLAST
  - \* p.txt
- matmoadj60
  - \* 0.25cnop
  - \* 0.5cnop
  - \* 0.75cnop
  - \* CNOPLAST
  - \* basic
  - \* cnop
  - \* p.txt
  - \* p0.5cnop
  - \* p20.txt
- paper.xlsx

The copyright of individual parts of the supplement might differ from the CC BY 4.0 License.
