# Supplementary material for: A novel approach for solving CNOPs and its application in identifying sensitive regions of tropical cyclone adaptive observations
Source: Copernicus journal article supplement (doi:10.5194/npg-25-693-2018), 2018-09-13
Supplement: Supplementary file 1 [file paper.xlsx]

## Sheet: Sheet1
fitow120	adj	psowsa					direct
	568.042	534.542		ADJ-method	ACPW		475.36
	500.382	403.355	0.75	0.119112	0.24542		401.859	0.154621
	405.353	307.032	0.5	0.286403	0.425618		360.762	0.241075
	349.284	271.666	0.25	0.385109	0.491778		216.503	0.544548
matmo120	adj	psowsa
	469.694	410.075		ADJ-method	ACPW
	412.81	333.527	0.75	0.12111	0.186667
	276.729	198.932	0.5	0.410831	0.514888
	208.553	115.368	0.25	0.555982	0.718665
fitow60
	1554.26	721.326		ADJ-method	ACPW
	1345.8	566.542	0.75	0.134124	0.214583
	956.163	392.434	0.5	0.38481	0.455955
	532.422	340.187	0.25	0.657443	0.528386
matmo60
	1027.77	1322.28		ADJ-method	ACPW
	975.887	1051.45	0.75	0.0504833	0.204826
	961.663	800.826	0.5	0.064323	0.394362
	673.289	476.384	0.25	0.344904	0.639727

## Sheet: Sheet3
523.274	692.329	920.49	-523.274	-692.329	-920.49
560.993	692.329	920.49	-560.993	-692.329	-920.49
571.905	723.726	1014	-571.905	-723.726	-1014
578.759	752.911	1014	-578.759	-752.911	-1014
586.924	752.911	1014	-586.924	-752.911	-1014
629.82	752.911	1030.52	-629.82	-752.911	-1030.52
648.282	752.911	1030.52	-648.282	-752.911	-1030.52
672.059	752.911	1085.34	-672.059	-752.911	-1085.34
681.098	752.911	1182.71	-681.098	-752.911	-1182.71
698.429	789.124	1215.84	-698.429	-789.124	-1215.84
733.655	789.124	1215.84	-733.655	-789.124	-1215.84
736.69	789.124	1247.97	-736.69	-789.124	-1247.97
737.044	789.124	1284.49	-737.044	-789.124	-1284.49
740.15	789.124	1336.04	-740.15	-789.124	-1336.04
751.908	789.124	1336.04	-751.908	-789.124	-1336.04
784.495	1042.81	1336.04	-784.495	-1042.81	-1336.04
801.635	1042.81	1347.97	-801.635	-1042.81	-1347.97
843.166	1042.81	1347.97	-843.166	-1042.81	-1347.97
872.989	1042.81	1347.97	-872.989	-1042.81	-1347.97
891.027	1042.81	1347.97	-891.027	-1042.81	-1347.97
891.027	1042.81	1347.97	-891.027	-1042.81	-1347.97
900.494	1042.81	1348.16	-900.494	-1042.81	-1348.16
900.494	1042.81	1348.16	-900.494	-1042.81	-1348.16
900.494	1042.81	1348.16	-900.494	-1042.81	-1348.16
900.494	1042.81	1348.16	-900.494	-1042.81	-1348.16
900.771	1042.81	1348.16	-900.771	-1042.81	-1348.16
900.771	1042.81	1350.94	-900.771	-1042.81	-1350.94
900.936	1042.81	1350.94	-900.936	-1042.81	-1350.94
904.536	1042.81	1350.94	-904.536	-1042.81	-1350.94
904.536	1042.81	1350.94	-904.536	-1042.81	-1350.94
909.852	1042.81	1351.1	-909.852	-1042.81	-1351.1
910.405	1042.81	1351.1	-910.405	-1042.81	-1351.1
910.405	1042.81	1351.54	-910.405	-1042.81	-1351.54
910.529	1042.81	1351.54	-910.529	-1042.81	-1351.54
910.529	1042.81	1351.54	-910.529	-1042.81	-1351.54
910.529	1042.81	1351.54	-910.529	-1042.81	-1351.54
910.529	1042.81	1351.54	-910.529	-1042.81	-1351.54
910.529	1042.81	1351.54	-910.529	-1042.81	-1351.54
910.529	1042.81	1351.54	-910.529	-1042.81	-1351.54
910.529	1042.81	1351.54	-910.529	-1042.81	-1351.54
910.569	1042.81	1351.54	-910.569	-1042.81	-1351.54
910.609	1042.81	1351.54	-910.609	-1042.81	-1351.54
910.632	1042.81	1351.54	-910.632	-1042.81	-1351.54
910.632	1042.81	1351.54	-910.632	-1042.81	-1351.54
910.632	1042.81	1351.54	-910.632	-1042.81	-1351.54
910.632	1042.81	1351.54	-910.632	-1042.81	-1351.54
910.632	1042.81	1351.54	-910.632	-1042.81	-1351.54
910.634	1042.81	1351.54	-910.634	-1042.81	-1351.54
910.634	1042.81	1351.54	-910.634	-1042.81	-1351.54
910.634	1042.81	1351.54	-910.634	-1042.81	-1351.54

## Sheet: Sheet2
PSOwsa&adj	60	120
Fitow	0.4346	-0.838
Matmo	0.3722	-0.4815

## Sheet: 20
		60km	120km
Fitow	ADJ-method	1507.64	534.335		0.0299933	0.0593392
	ACPW	727.378	491.496		-0.00838955	0.0805286
Matmo	ADJ-method	964.86	371.738		0.0612125	0.209007
	ACPW	1051.45	343.388		0.204826	0.162621
		60km（30）	120km（6）
Fitow	ADJ-method	1493.63	558.284		0.0390079	0.0171779
	ACPW	690.807	534.488		0.0423099	0.000101395
Matmo	ADJ-method	1015.35	407.722		0.0120821	0.132439
	ACPW	1193.32	381.95		0.0975319	0.0685851
		60km（30）	120km（6）
Fitow	ADJ-method	1554.26	568.042
	ACPW	721.326	534.542
Matmo	ADJ-method	1027.77	469.964
	ACPW	1322.28	410.075
